# Supplementary material
Source: PubMed Central journal article supplement (PMC2200805)

**A**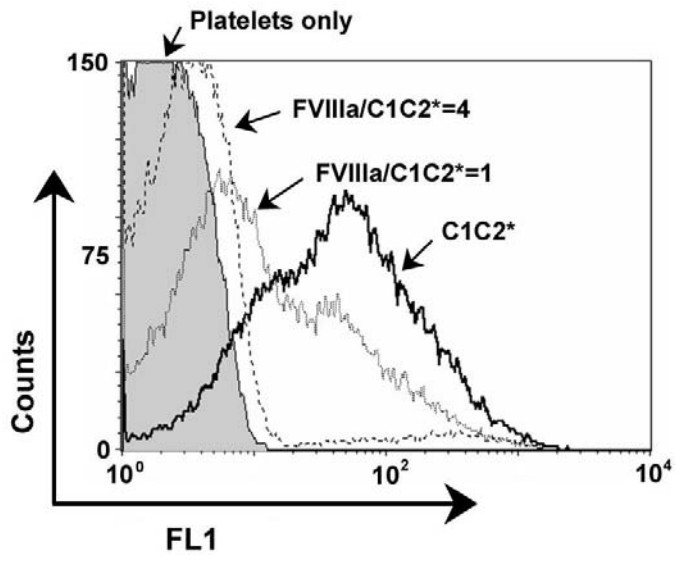**B**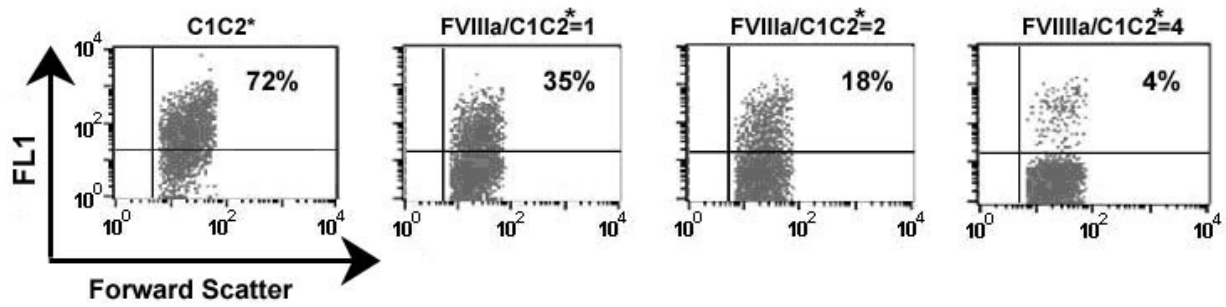

Supplement: blood_blood-2007-01-068957_1.pdf [file blood_blood-2007-01-068957_1.pdf]

**C**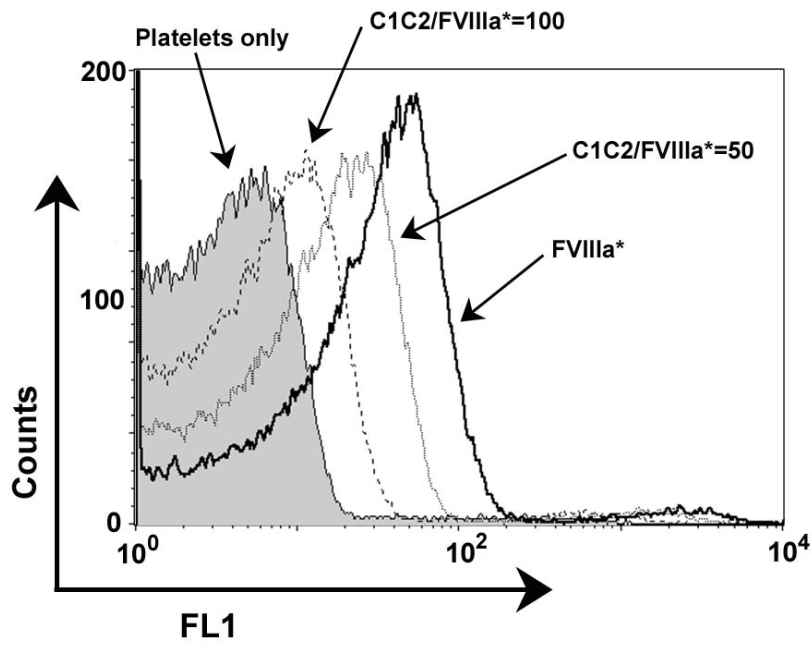**D**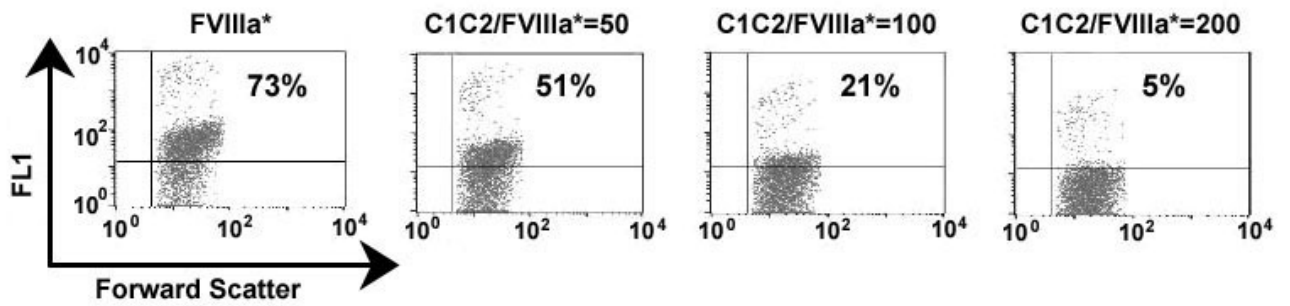

Supplement: blood_blood-2007-01-068957_2.pdf [file blood_blood-2007-01-068957_2.pdf]
